# Supplementary material
Source: PubMed Central journal article supplement (PMC5558435)
Supplement: NIHMS888777-supplement-McConnell_SM.pdf [file NIHMS888777-supplement-McConnell_SM.pdf]

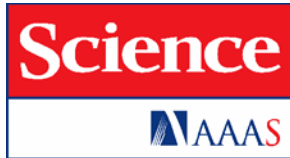

## Supplementary Materials for

### **Intersection of diverse neuronal genomes and neuropsychiatric disease: The Brain Somatic Mosaicism Network**

Michael J. McConnell,\*† John V. Moran,\*† Alexej Abyzov, Schahram Akbarian, Taejeong Bae, Isidro Cortes-Ciriano, Jennifer A. Erwin, Liana Fasching, Diane A. Flasch, Donald Freed, Javier Ganz, Andrew E. Jaffe, Kenneth Y. Kwan, Minseok Kwon, Michael A. Lodato, Ryan E. Mills, Apua C. M. Paquola, Rachel E. Rodin, Chaggai Rosenbluh, Nenad Sestan, Maxwell A. Sherman, Joo Heon Shin, Saera Song, Richard E. Straub, Jeremy Thorpe, Daniel R. Weinberger, Alexander E. Urban, Bo Zhou, Fred H. Gage, Thomas Lehner, Geetha Senthil, Christopher A. Walsh, Andrew Chess, Eric Courchesne, Joseph G. Gleeson, Jeffrey M. Kidd, Peter J. Park, Jonathan Pevsner, Flora M. Vaccarino, Brain Somatic Mosaicism Network

\*These authors contributed equally to this work.

†Corresponding author. Email: mikemc@virginia.edu (M.J.M.), moranj@mich.edu (J.V.M.)

Published 28 April 2017, *Science* **356**, eaal1641 (2017)  
DOI: 10.1126/science.aal1641

#### **This PDF file includes:**

Brain Somatic Mosaicism Network Members List

## **Brain Somatic Mosaicism Network Members**

### **Schahram Akbarian**

Department of Psychiatry, Friedman Brain Institute, Icahn School of Medicine at Mount Sinai  
Hess Center for Science and Medicine, 9-105, 1470 Madison Avenue, New York, NY 10029

[schahram.akbarian@mssm.edu](mailto:schahram.akbarian@mssm.edu)

### **Eric Courchesne**

Autism Center of Excellence, Department of Neuroscience, School of Medicine, University of California  
San Diego

8110 La Jolla Shores Drive, La Jolla, CA 92037

[ecourchesne@ucsd.edu](mailto:ecourchesne@ucsd.edu)

### **Tiziano Pramparo**

Department of Neurosciences, UC San Diego Autism Center, School of Medicine University of California  
San Diego

8110 La Jolla Shores Dr., Suite 201, La Jolla, CA 92037

[tpramparo@ucsd.edu](mailto:tpramparo@ucsd.edu)

### **Fred H. Gage**

The Salk Institute for Biological Studies

10010 North Torrey Pines Rd., La Jolla, CA 92037

[gage@salk.edu](mailto:gage@salk.edu)

### **Jennifer A. Erwin**

The Salk Institute for Biological Studies

10010 N. Torrey Pines Rd. La Jolla, CA 92037

[jerwin@salk.edu](mailto:jerwin@salk.edu)

### **Apuã C. M. Paquola**

The Salk Institute for Biological Studies

10010 N Torrey Pines Rd, La Jolla, CA 92037

[apaquola@salk.edu](mailto:apaquola@salk.edu)

### **Meiyan Wang**

The Salk Institute for Biological Studies

10010 N. Torrey Pines Rd. La Jolla, CA 92037

[mwang@salk.edu](mailto:mwang@salk.edu)

### **Joseph G. Gleeson**

Howard Hughes Medical Institute, Laboratory of Pediatric Brain Disease, The Rockefeller University,  
1230 York Ave., New York, NY 10065 and Rady Institute of Genomic Medicine, University of California,  
9500 Gilman Dr., San Diego, La Jolla, CA 92093

[jogleeson@ucsd.edu](mailto:jogleeson@ucsd.edu)

### **Saera Song**

Howard Hughes Medical Institute, Laboratory of Pediatric Brain Disease, The Rockefeller University,  
1230 York Ave., New York, NY 10065 and Rady Institute of Genomic Medicine, University of California,  
9500 Gilman Dr., San Diego, La Jolla, CA 92093

[ssong@mail.rockefeller.edu](mailto:ssong@mail.rockefeller.edu)

**Gary W. Mathern**

The Crandall/Davies endowed Chair for Epilepsy Research at UCLA, Professor Departments of Neurosurgery, and Psychiatry and Biobehavioral Medicine, Mattel Children's Hospital and David Geffen School of Medicine, University of California, Los Angeles, CA 90095

[gmathern@ucla.edu](mailto:gmathern@ucla.edu)

**Michael J. McConnell**

Department of Biochemistry and Molecular Genetics, Department of Neuroscience, Center for Brain Immunology and Glia, Center for Public Health Genomics, Children's Health Research Center, University of Virginia School of Medicine, 1340 Jefferson Park Ave, Charlottesville, VA 22908

[mikemc@virginia.edu](mailto:mikemc@virginia.edu)

**Stefan Bekiranov**

Department of Biochemistry and Molecular Genetics, Center for Public Health Genomics, University of Virginia School of Medicine, 1340 Jefferson Park Ave, Charlottesville, VA 22908

[Sb3de@virginia.edu](mailto:Sb3de@virginia.edu)

**Aakrosh Ratan**

Department of Biochemistry and Molecular Genetics, Center for Public Health Genomics, University of Virginia School of Medicine, 1340 Jefferson Park Ave, Charlottesville, VA 22908

[Ar7jq@virginia.edu](mailto:Ar7jq@virginia.edu)

**Ian E. Burbulis**

Department of Biochemistry and Molecular Genetics, University of Virginia School of Medicine, 1340 Jefferson Park Ave, Charlottesville, VA 22908

[ieb3c@virginia.edu](mailto:ieb3c@virginia.edu)

**William Chronister**

Department of Biochemistry and Molecular Genetics, Biomedical Sciences Graduate Program, University of Virginia School of Medicine, 1340 Jefferson Park Ave, Charlottesville, VA 22908

[Wdc8rf@virginia.edu](mailto:Wdc8rf@virginia.edu)

**Margaret Wierman**

Department of Biochemistry and Molecular Genetics, University of Virginia School of Medicine, 1340 Jefferson Park Ave, Charlottesville, VA 22908

[Mbw6hh@virginia.edu](mailto:Mbw6hh@virginia.edu)

**Matthew Wolpert**

Department of Biochemistry and Molecular Genetics, University of Virginia School of Medicine, 1340 Jefferson Park Ave, Charlottesville, VA 22908

[Mjw8qw@virginia.edu](mailto:Mjw8qw@virginia.edu)

**Mark Haakenson**

Department of Biochemistry and Molecular Genetics, University of Virginia School of Medicine, 1340 Jefferson Park Ave, Charlottesville, VA 22908

**John V. Moran**

University of Michigan Medical School

Department of Human Genetics, 1241 E. Catherine St., Ann Arbor, MI 48109-5618

Department of Internal Medicine, 1500 East Medical Center Drive, Ann Arbor, MI 48109

[moranj@umich.edu](mailto:moranj@umich.edu)

**Huira C. Kopera**

University of Michigan Medical School  
Department of Human Genetics, 1241 E. Catherine St., Ann Arbor, MI 48109-5618  
[chongh@umich.edu](mailto:chongh@umich.edu)

**John B. Moldovan**

University of Michigan Medical School  
Department of Human Genetics, 1241 E. Catherine St., Ann Arbor, MI 48109-5618  
[jmoldova@umich.edu](mailto:jmoldova@umich.edu)

**Diane A. Flasch**

University of Michigan Medical School  
Department of Human Genetics, 1241 E. Catherine St., Ann Arbor, MI 48109-5618  
[daflasch@umich.edu](mailto:daflasch@umich.edu)

**Trenton J. Frisbie**

University of Michigan Medical School  
Department of Human Genetics, 1241 E. Catherine St., Ann Arbor, MI 48109-5618  
[friz@umich.edu](mailto:friz@umich.edu)

**Jeffrey M. Kidd**

University of Michigan Medical School  
Department of Human Genetics, 1241 E. Catherine St., Ann Arbor, MI 48109-5618  
Department of Computational Medicine & Bioinformatics, 100 Washtenaw Ave, Ann Arbor, MI 48109  
[jmkidd@umich.edu](mailto:jmkidd@umich.edu)

**Matthew T. Oetjens**

University of Michigan Medical School  
Department of Human Genetics, 1241 E. Catherine St., Ann Arbor, MI 48109-5618  
[moetjens@umich.edu](mailto:moetjens@umich.edu)

**Sarah B. Emery**

University of Michigan Medical School  
Department of Human Genetics, 1241 E. Catherine St., Ann Arbor, MI 48109-5618  
[sbherman@umich.edu](mailto:sbherman@umich.edu)

**Ryan E. Mills**

University of Michigan Medical School  
Department of Computational Medicine & Bioinformatics  
100 Washtenaw Ave, Ann Arbor, MI 48109-2218  
Department of Human Genetics, 1241 E. Catherine St., Ann Arbor, MI 48109-5618  
[remills@umich.edu](mailto:remills@umich.edu)

**Weichen Zhou**

University of Michigan Medical School  
Department of Computational Medicine & Bioinformatics  
100 Washtenaw Ave, Ann Arbor, MI 48109-2218  
Department of Human Genetics, 1241 E. Catherine St., Ann Arbor, MI 48109-5618  
[arthurz@umich.edu](mailto:arthurz@umich.edu)

**Yifan Wang**

University of Michigan Medical School  
Department of Human Genetics, 1241 E. Catherine St., Ann Arbor, MI 48109-5618  
[yifwang@umich.edu](mailto:yifwang@umich.edu)

**Xuefang Zhao**

University of Michigan Medical School  
Department of Computational Medicine & Bioinformatics  
100 Washtenaw Avenue, Ann Arbor, MI 48109-2218  
[xuefzhao@umich.edu](mailto:xuefzhao@umich.edu)

**Kenneth Y. Kwan**

University of Michigan Medical School  
Molecular and Behavioral Neuroscience Institute, 109 Zina Pitcher Place, Ann Arbor MI 48109-2200  
Department of Human Genetics, 1241 E. Catherine St., Ann Arbor, MI 48109-5618  
[kykwan@umich.edu](mailto:kykwan@umich.edu)

**Lei Shi**

University of Michigan Medical School  
Molecular and Behavioral Neuroscience Institute, 109 Zina Pitcher Place, Ann Arbor MI 48109-2200  
Department of Human Genetics, 1241 E. Catherine St., Ann Arbor, MI 48109-5618  
[leshi@umich.edu](mailto:leshi@umich.edu)

**Mandy M. Lam**

University of Michigan Medical School  
Molecular and Behavioral Neuroscience Institute, 109 Zina Pitcher Place, Ann Arbor MI 48109-2200  
Department of Human Genetics, 1241 E. Catherine St., Ann Arbor, MI 48109-5618  
[mandylam@umich.edu](mailto:mandylam@umich.edu)

**Jason M. Keil**

University of Michigan Medical School  
Molecular and Behavioral Neuroscience Institute, 109 Zina Pitcher Place, Ann Arbor MI 48109-2200  
Department of Human Genetics, 1241 E. Catherine St., Ann Arbor, MI 48109-5618  
[jmkeil@umich.edu](mailto:jmkeil@umich.edu)

**Mette A. Peters**

Sage Bionetworks  
1100 Fairview Ave North, M1-C108  
Seattle, WA, 98109-1024  
[mette.peters@sagebase.org](mailto:mette.peters@sagebase.org)

**Larsson Omberg**

Sage Bionetworks  
1100 Fairview Ave North, M1-C108  
Seattle, WA, 98109-1024  
[larsson.omberg@sagebase.org](mailto:larsson.omberg@sagebase.org)

**Kenneth Daily**

Sage Bionetworks  
1100 Fairview Ave North, M1-C108  
Seattle, WA, 98109-1024  
[kenneth.daily@sagebase.org](mailto:kenneth.daily@sagebase.org)

**Nenad Sestan**

Department of Neuroscience and Kavli Institute for Neuroscience, 333 Cedar St., Yale School of  
Medicine, New Haven, CT 06510, USA.  
[nenad.sestan@yale.edu](mailto:nenad.sestan@yale.edu)

**Sirisha Pochareddy**

Department of Neuroscience and Kavli Institute for Neuroscience, 333 Cedar St., Yale School of Medicine, New Haven, CT 06510, USA.

[sirisha.pochareddy@yale.edu](mailto:sirisha.pochareddy@yale.edu)

**Mario Skarica**

Department of Neuroscience and Kavli Institute for Neuroscience, 333 Cedar St., Yale School of Medicine, New Haven, CT 06510, USA.

[mario.skarica@yale.edu](mailto:mario.skarica@yale.edu)

**Tianliuyun Gao**

Department of Neuroscience and Kavli Institute for Neuroscience, 333 Cedar St., Yale School of Medicine, New Haven, CT 06510, USA.

[tianliuyun.gao@yale.edu](mailto:tianliuyun.gao@yale.edu)

**Tomas Marques-Bonet**

Institute of Evolutionary Biology (UPF-CSIC), PRBB, Dr. Aiguader 88, 08003 Barcelona, Spain

Catalan Institution of Research and Advanced Studies (ICREA), Passeig de Lluís Companys, 23, 08010, Barcelona, Spain

CNAG-CRG, Centre for Genomic Regulation (CRG), Barcelona Institute of Science and Technology (BIST), Baldiri i Reixac 4, 08028 Barcelona, Spain

[tomas.marques@upf.edu](mailto:tomas.marques@upf.edu)

**Flora M. Vaccarino**

Yale School of Medicine  
Child Study Center and Department of Neuroscience  
333 Cedar St., New Haven CT 06520

[Flora.vaccarino@yale.edu](mailto:Flora.vaccarino@yale.edu)

**Liana Fasching**

Yale School of Medicine  
Child Study Center  
333 Cedar St., New Haven CT 06520

[Liana.fasching@yale.edu](mailto:Liana.fasching@yale.edu)

**Alexej Abyzov**

Department of Health Sciences Research, Center for Individualized Medicine, Mayo Clinic  
200 1st street SW, Rochester, MN 55905

[abyzov.alexej@mayo.edu](mailto:abyzov.alexej@mayo.edu)

**Taejeong Bae**

Department of Health Sciences Research, Center for Individualized Medicine, Mayo Clinic  
200 1st street SW, Rochester, MN 55905

[tajeong.bae@mayo.edu](mailto:tajeong.bae@mayo.edu)

**Gianfilippo Coppola**

Yale School of Medicine  
Department of Psychiatry and Child Study Center  
230 South Frontage Rd, New Haven, CT 06520

[gianfilippo.coppola@yale.edu](mailto:gianfilippo.coppola@yale.edu)

**Alexander Eckehart Urban**

Stanford University School of Medicine, Department of Psychiatry and Behavioral Sciences and  
Department of Genetics  
3165 Porter Drive, Room 2180, Palo Alto, CA, 94304-1213  
[aeurban@stanford.edu](mailto:aeurban@stanford.edu)

**Bo Zhou**

Stanford University School of Medicine, Department of Psychiatry and Behavioral Sciences and  
Department of Genetics  
3165 Porter Drive, Room 2260, Palo Alto, CA, 94304-1213  
[bo.zhou@stanford.edu](mailto:bo.zhou@stanford.edu)

**Christopher A. Walsh**

Division of Genetics and Genomics, Manton Center for Orphan Disease, and Howard Hughes Medical  
Institute, Boston Children's Hospital, 3 Blackfan Circle, Boston, MA, USA; Departments of Neurology and  
Pediatrics, Harvard Medical School, 25 Shattuck Street, Boston, MA, USA; and Broad Institute of MIT  
and Harvard, 415 Main St., Cambridge, MA, USA  
[Christopher.Walsh@childrens.harvard.edu](mailto:Christopher.Walsh@childrens.harvard.edu)

**Rachel E. Rodin**

Division of Genetics and Genomics, Manton Center for Orphan Disease, and Howard Hughes Medical  
Institute, Boston Children's Hospital, 3 Blackfan Circle, Boston, MA, USA; Departments of Neurology and  
Pediatrics, Harvard Medical School, 25 Shattuck Street, Boston, MA, USA; and Broad Institute of MIT  
and Harvard, 415 Main St., Cambridge, MA, USA  
[Rachel.Reiff@childrens.harvard.edu](mailto:Rachel.Reiff@childrens.harvard.edu)

**Mollie Woodworth**

Division of Genetics and Genomics, Manton Center for Orphan Disease, and Howard Hughes Medical  
Institute, Boston Children's Hospital, 3 Blackfan Circle, Boston, MA, USA; Departments of Neurology and  
Pediatrics, Harvard Medical School, 25 Shattuck Street, Boston, MA, USA; and Broad Institute of MIT  
and Harvard, 415 Main St., Cambridge, MA, USA  
[Mollie.Woodworth@childrens.harvard.edu](mailto:Mollie.Woodworth@childrens.harvard.edu)

**Alissa M. D'Gama**

Division of Genetics and Genomics, Manton Center for Orphan Disease, and Howard Hughes Medical  
Institute, Boston Children's Hospital, 3 Blackfan Circle, Boston, MA, USA; Departments of Neurology and  
Pediatrics, Harvard Medical School, 25 Shattuck Street, Boston, MA, USA; and Broad Institute of MIT  
and Harvard, 415 Main St., Cambridge, MA, USA  
[alissa.dgama@childrens.harvard.edu](mailto:alissa.dgama@childrens.harvard.edu)

**Javier Ganz**

Division of Genetics and Genomics, Manton Center for Orphan Disease, and Howard Hughes Medical  
Institute, Boston Children's Hospital, 3 Blackfan Circle, Boston, MA, USA; Departments of Neurology and  
Pediatrics, Harvard Medical School, 25 Shattuck Street, Boston, MA, USA; and Broad Institute of MIT  
and Harvard, 415 Main St., Cambridge, MA, USA  
[Javier.Ganz@childrens.harvard.edu](mailto:Javier.Ganz@childrens.harvard.edu)

**Michael A. Lodato**

Division of Genetics and Genomics, Manton Center for Orphan Disease, and Howard Hughes Medical  
Institute, Boston Children's Hospital, 3 Blackfan Circle, Boston, MA, USA; Departments of Neurology and  
Pediatrics, Harvard Medical School, 25 Shattuck Street, Boston, MA, USA; and Broad Institute of MIT  
and Harvard, 415 Main St., Cambridge, MA, USA  
[Michael.Lodato@childrens.harvard.edu](mailto:Michael.Lodato@childrens.harvard.edu)

**Peter J. Park**

Department of Biomedical Informatics  
Harvard Medical School  
10 Shattuck St  
Boston, MA 02115  
[peter\\_park@hms.harvard.edu](mailto:peter_park@hms.harvard.edu)

**Minseok Kwon**

Department of Biomedical Informatics  
Harvard Medical School  
10 Shattuck St  
Boston, MA 02115  
[minseok\\_kwon@hms.harvard.edu](mailto:minseok_kwon@hms.harvard.edu)

**Maxwell A. Sherman**

Department of Biomedical Informatics  
Harvard Medical School  
10 Shattuck St  
Boston, MA 02115  
[maxwell\\_sherman@hms.harvard.edu](mailto:maxwell_sherman@hms.harvard.edu)

**Alison R. Barton**

Department of Biomedical Informatics  
Harvard Medical School  
10 Shattuck St  
Boston, MA 02115  
[Alison\\_Barton@hms.harvard.edu](mailto:Alison_Barton@hms.harvard.edu)

**Craig L. Bohrson**

Department of Biomedical Informatics  
Harvard Medical School  
10 Shattuck St  
Boston, MA 02115  
[craigbohrson@g.harvard.edu](mailto:craigbohrson@g.harvard.edu)

**Isidro Cortes-Ciriano**

Department of Biomedical Informatics  
Harvard Medical School  
10 Shattuck St  
Boston, MA 02115  
[isidro\\_cortesciriano@hms.harvard.edu](mailto:isidro_cortesciriano@hms.harvard.edu)

**Eunjung Alice Lee**

Department of Biomedical Informatics  
Harvard Medical School  
10 Shattuck St  
Boston, MA 02115  
[ejalice.lee@gmail.com](mailto:ejalice.lee@gmail.com)



**Tiziana Sanavia**

Department of Biomedical Informatics  
Harvard Medical School  
10 Shattuck St  
Boston, MA 02115  
[tiziana\\_sanavia@hms.harvard.edu](mailto:tiziana_sanavia@hms.harvard.edu)

**Jia Wang**

Department of Biomedical Informatics  
Harvard Medical School  
10 Shattuck St  
Boston, MA 02115  
[jia\\_wang@hms.harvard.edu](mailto:jia_wang@hms.harvard.edu)

**Daniel R. Weinberger**

Lieber Institute for Brain Development, 855 North Wolfe Street, Baltimore, Maryland 21205.  
Department of Psychiatry and Behavioral Sciences; Department of Neurology, 600 N. Wolfe St.,  
Baltimore, MD 21287. McKusick-Nathans Institute of Genetic Medicine, Johns Hopkins School of  
Medicine, 733 North Broadway, Baltimore, Maryland 21230  
[drweinberger@libd.org](mailto:drweinberger@libd.org)

**Richard E. Straub**

Lieber Institute for Brain Development, 855 North Wolfe Street, Baltimore, Maryland 21205  
[Richard.straub@libd.org](mailto:Richard.straub@libd.org)

**Joo Heon Shin**

Lieber Institute for Brain Development, 855 North Wolfe Street, Baltimore, Maryland 21205  
[Jooheon.Shin@libd.org](mailto:Jooheon.Shin@libd.org)

**Andrew E. Jaffe**

Lieber Institute for Brain Development, 855 North Wolfe Street, Baltimore MD 21205  
Department of Mental Health, Johns Hopkins Bloomberg School of Public Health, 615 North Wolfe  
Street, Baltimore MD 21205  
[Andrew.Jaffe@libd.org](mailto:Andrew.Jaffe@libd.org)

**Andrew Chess**

Department of Cell, Developmental and Regenerative Biology, Department of Genetics and Genomic  
Sciences, Department of Neuroscience, Friedman Brain Institute, Icahn Institute for Genomics and  
Multiscale Biology  
Icahn School of Medicine at Mount Sinai  
One Gustave L. Levy Place  
Box 1020, New York, NY 10029  
[andrew.chess@mssm.edu](mailto:andrew.chess@mssm.edu)

**Chaggai Rosenbluh**

Department of Cell, Developmental and Regenerative Biology, Department of Genetics and Genomic  
Sciences  
Icahn School of Medicine at Mount Sinai  
One Gustave L. Levy Place  
Box 1020, New York, NY 10029  
[chaggai.rosenbluh@mssm.edu](mailto:chaggai.rosenbluh@mssm.edu)

**Attila Gulyás-Kovács**

Department of Developmental and Regenerative Biology, Department of Genetics and Genomic Sciences

Icahn School of Medicine at Mount Sinai

One Gustave L. Levy Place

Box 1020, New York, NY 10029

[attila.gulyas-kovacs@mssm.edu](mailto:attila.gulyas-kovacs@mssm.edu)

**Jonathan Pevsner**

Department of Neurology, Kennedy Krieger Institute, 707 N. Broadway, Baltimore, MD 21205

Program in Biochemistry, Cellular and Molecular Biology, 725 N. Wolfe Street, Johns Hopkins School of Medicine, Baltimore, MD 21205

[pevsner@kennedykrieger.org](mailto:pevsner@kennedykrieger.org)

**Donald Freed**

Department of Neurology, Kennedy Krieger Institute, 707 N. Broadway, Baltimore, MD 21205

Program in Biochemistry, Cellular and Molecular Biology, Johns Hopkins School of Medicine, Baltimore, MD 21205

[don.freed@sentieon.com](mailto:don.freed@sentieon.com)

**Jeremy Thorpe**

Department of Neurology, Kennedy Krieger Institute, 707 N. Broadway, Baltimore, MD 21205

Program in Biochemistry, Cellular and Molecular Biology, 725 N. Wolfe Street, Johns Hopkins School of Medicine, Baltimore, MD 21205

[jthorpe6@jhmi.edu](mailto:jthorpe6@jhmi.edu)

**Geetha Senthil**

Office of Genomics Research Coordination, National Institute of Mental Health, National Institutes of Health, 6001 Executive Boulevard, Rockville, MD, 20852

[senthilgs@mail.nih.gov](mailto:senthilgs@mail.nih.gov)

**Thomas Lehner**

Office of Genomics Research Coordination, National Institute of Mental Health, National Institutes of Health, 6001 Executive Boulevard, Rockville, MD, 20852

[tlehner@mail.nih.gov](mailto:tlehner@mail.nih.gov)
